# Supplementary material for: Extraction of Polyphenols from Slovenian Hop (Humulus lupulus L.) Aurora Variety Using Deep Eutectic Solvents: Choice of the Extraction Method vs. Structure of the Solvent
Source: MDPI journal article supplement (doi:10.3390/plants12162890), 2023-08-08
Supplement: s1 [file s1]

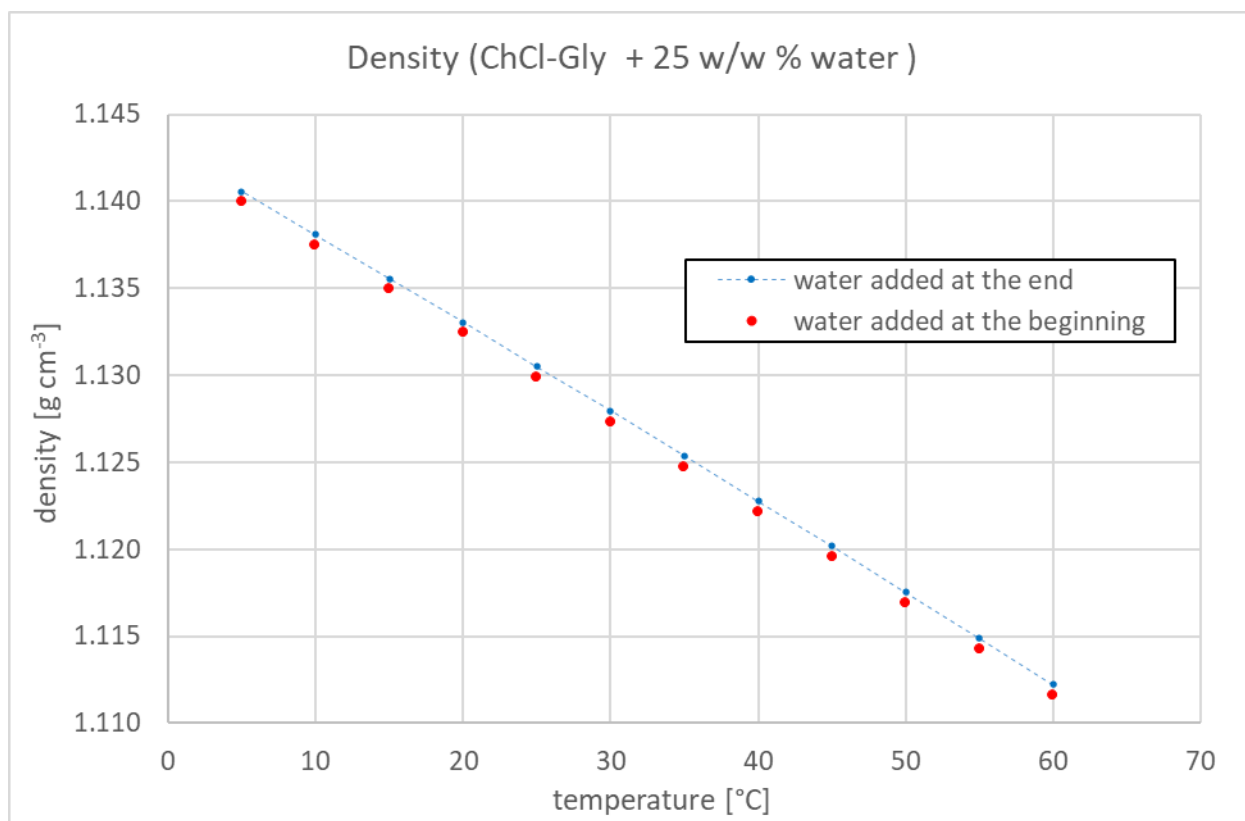

**Figure S1a.** Density of concentrated ChCl-Gly (Table 1) aqueous DES mixture as a function of temperature and the kind of preparation (time of adding water to DES). The samples were prepared by different persons.

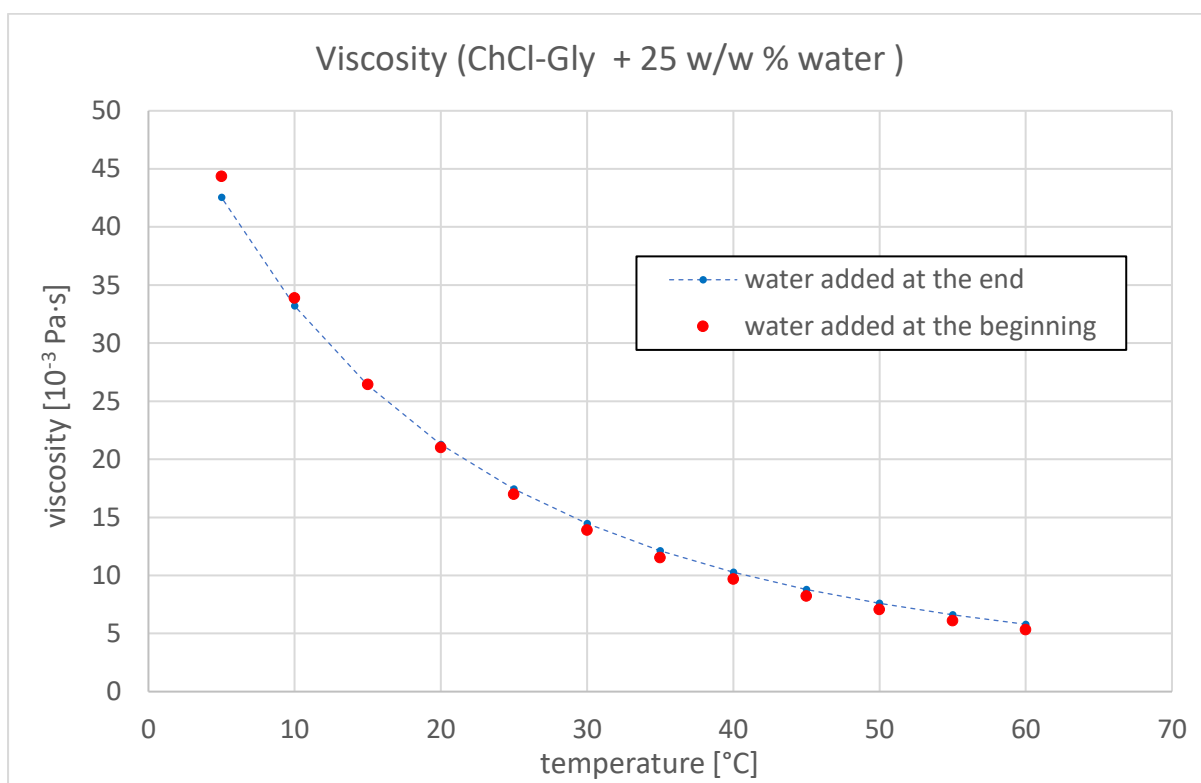

**Figure S1b.** Viscosity of concentrated ChCl-Gly (Table 1) aqueous DES mixture as a function of temperature and the kind of preparation (time of adding water to DES). The samples were prepared by different persons.

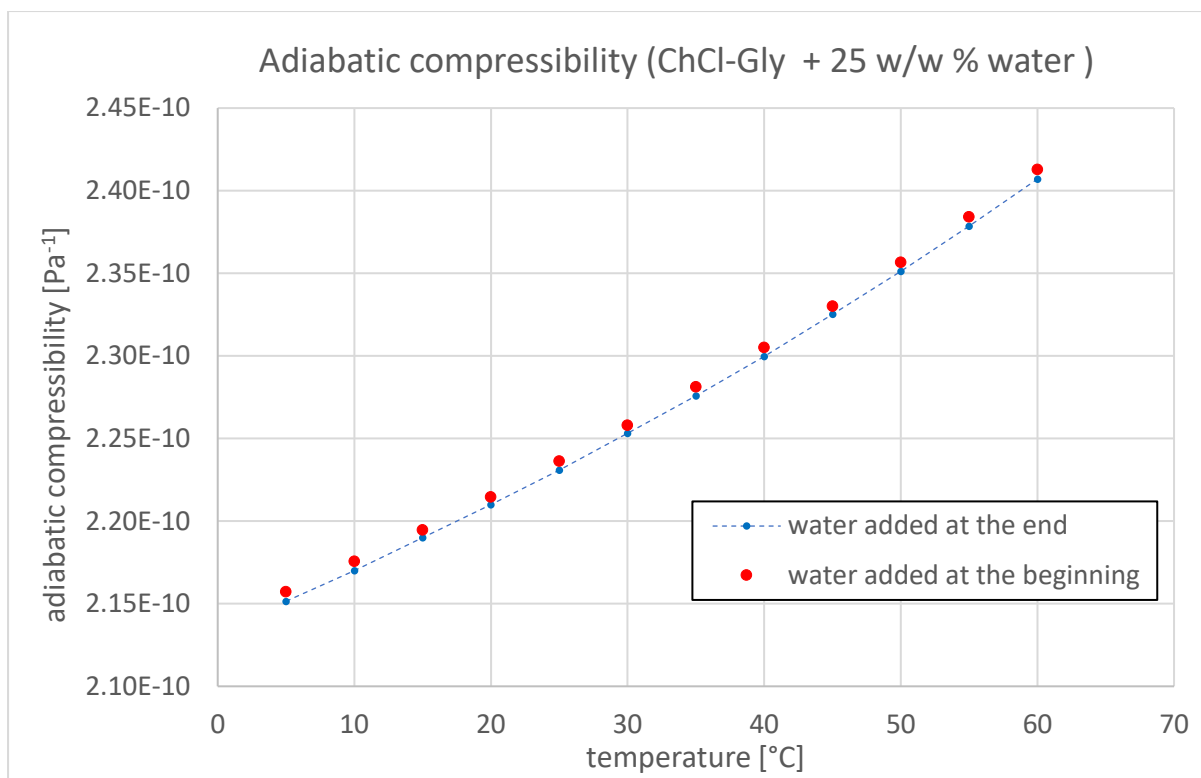

**Figure S1c.** Adiabatic compressibility of concentrated ChCl-Gly (Table 1) aqueous DES mixture as a function of temperature and the kind of preparation (time of adding water to DES). The samples were prepared by different persons.

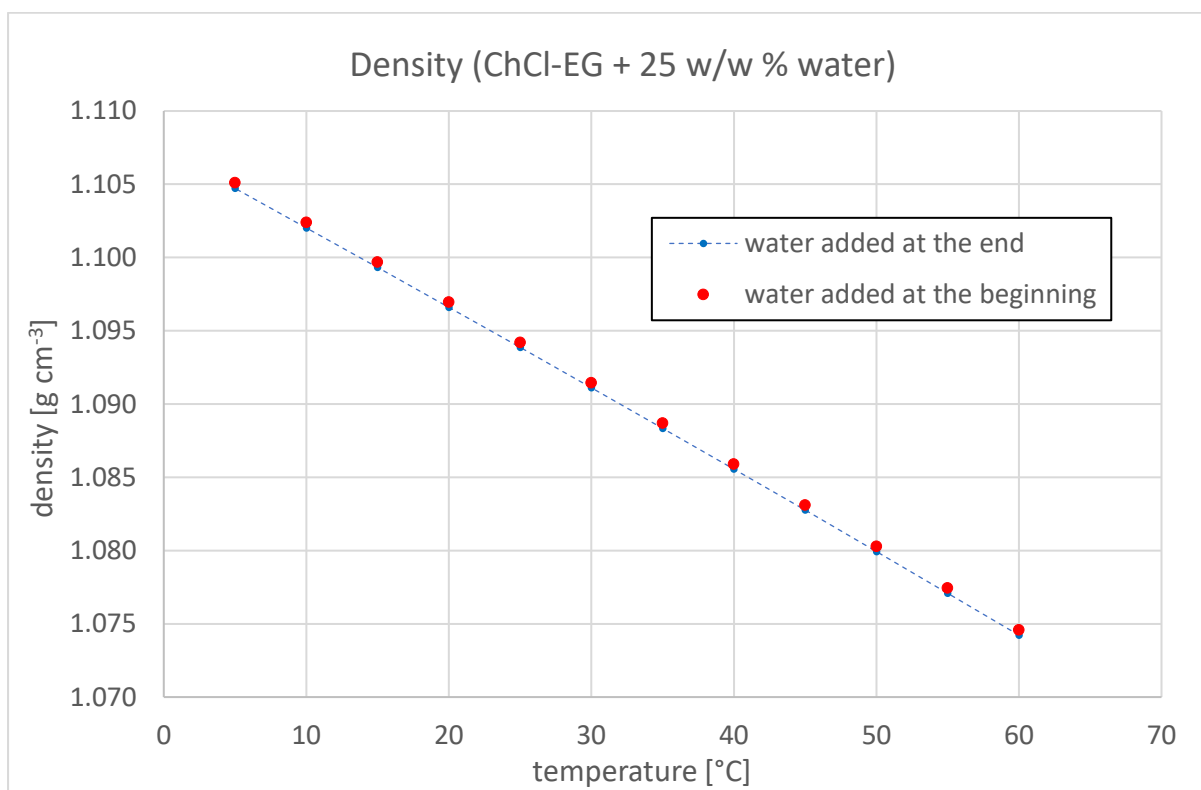

**Figure S2a.** Density of concentrated ChCl-EG (Table 1) aqueous DES mixture as a function of temperature and the kind of preparation (time of adding water to DES). The samples were prepared by different persons.

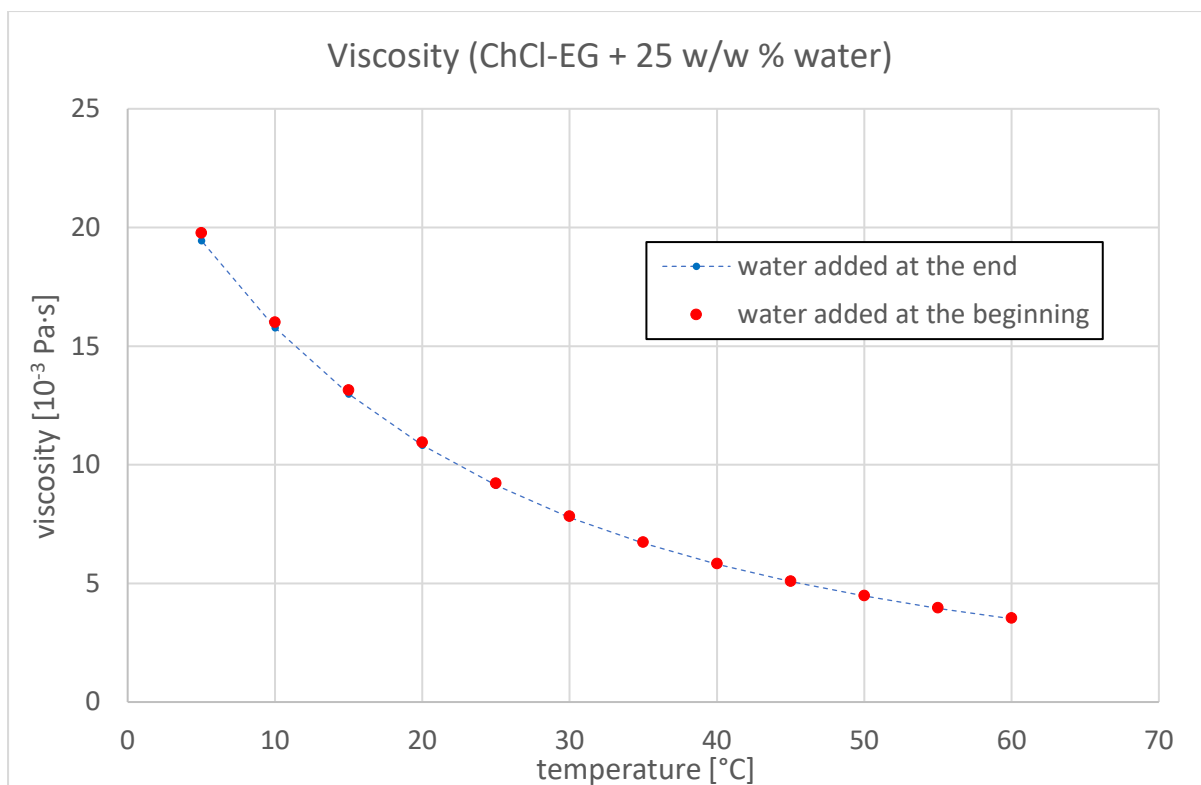

**Figure S2b.** Viscosity of concentrated ChCl-EG (Table 1) aqueous DES mixture as a function of temperature and the kind of preparation (time of adding water to DES). The samples were prepared by different persons.

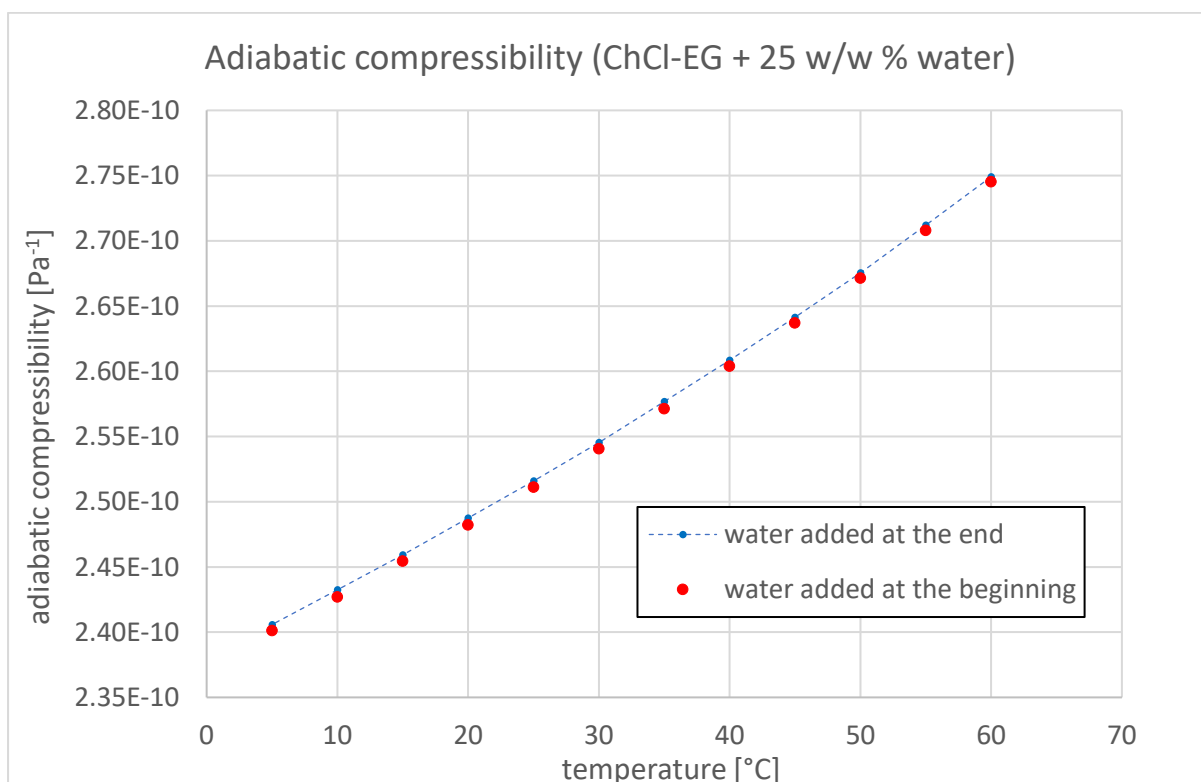

**Figure S2c.** Adiabatic compressibility of concentrated ChCl-EG (Table 1) aqueous DES mixture as a function of temperature and the kind of preparation (time of adding water to DES). The samples were prepared by different persons.

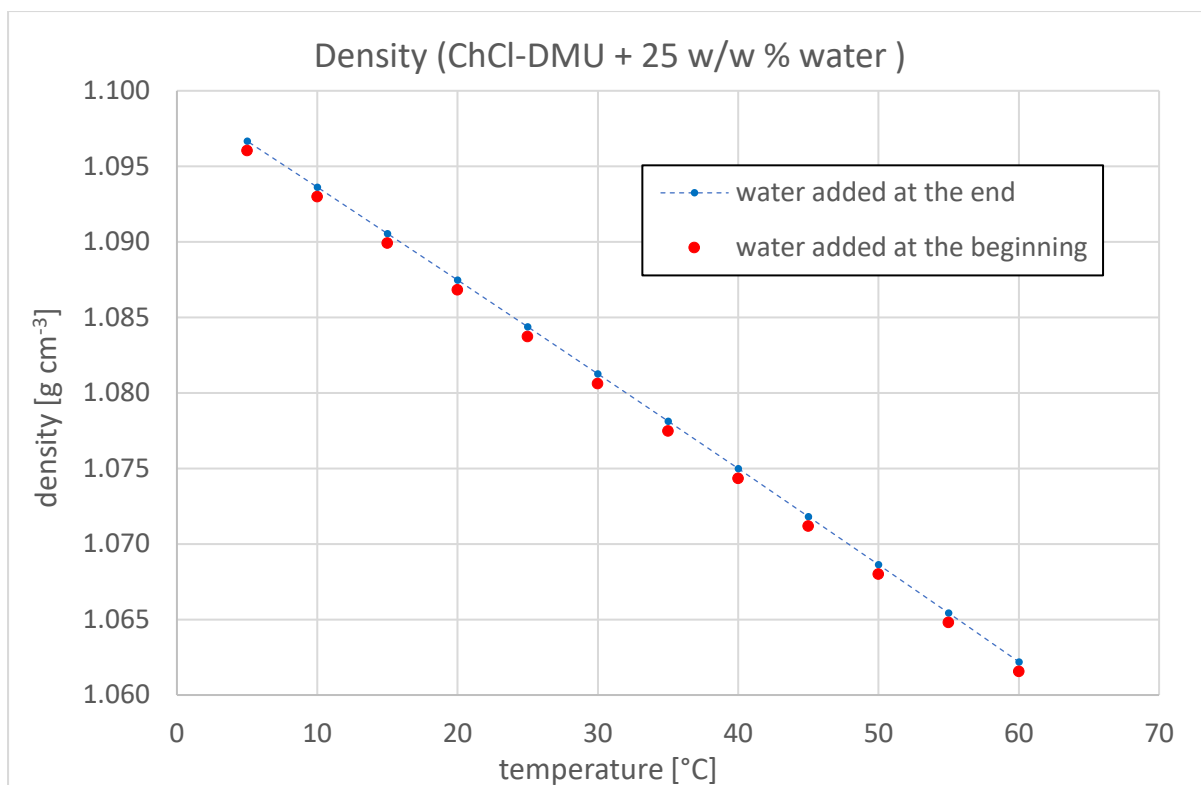

**Figure S3a.** Density of concentrated ChCl-DMU (Table 1) aqueous DES mixture as a function of temperature and the kind of preparation (time of adding water to DES). The samples were prepared by different persons.

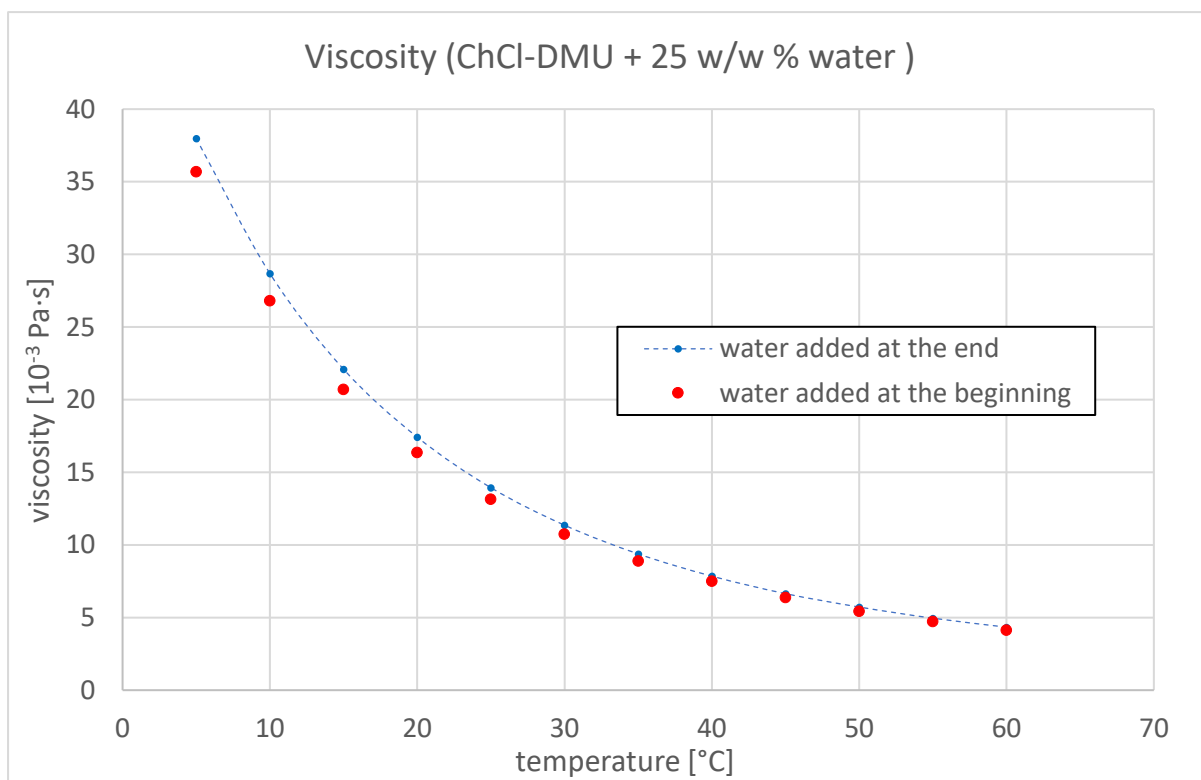

**Figure S3b.** Viscosity of concentrated ChCl-DMU (Table 1) aqueous DES mixture as a function of temperature and the kind of preparation (time of adding water to DES). The samples were prepared by different persons.

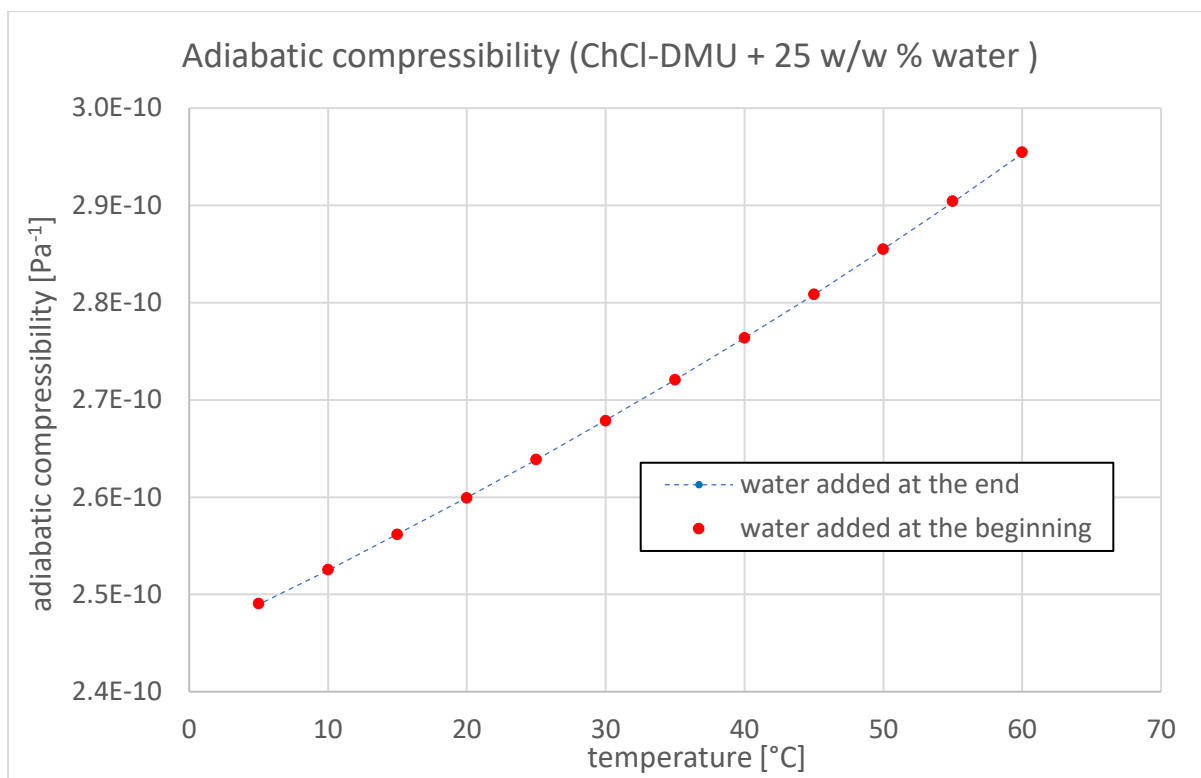

**Figure S3c.** Adiabatic compressibility of concentrated ChCl-DMU (Table 1) aqueous DES mixture as a function of temperature and the kind of preparation (time of adding water to DES). The samples were prepared by different persons.

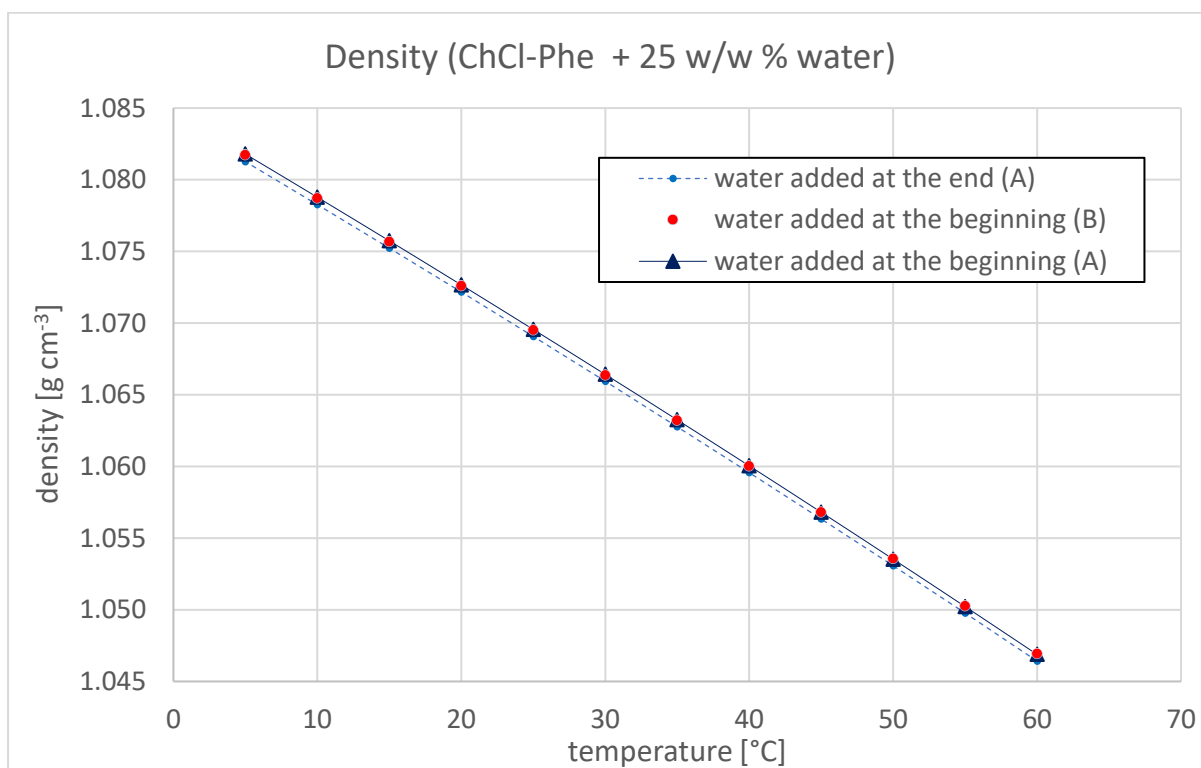

**Figure S4a.** Density of concentrated ChCl-Phe (Table 1) aqueous DES mixture as a function of temperature and the kind of preparation (time of adding water to DES). The samples were prepared by different persons (A and B).

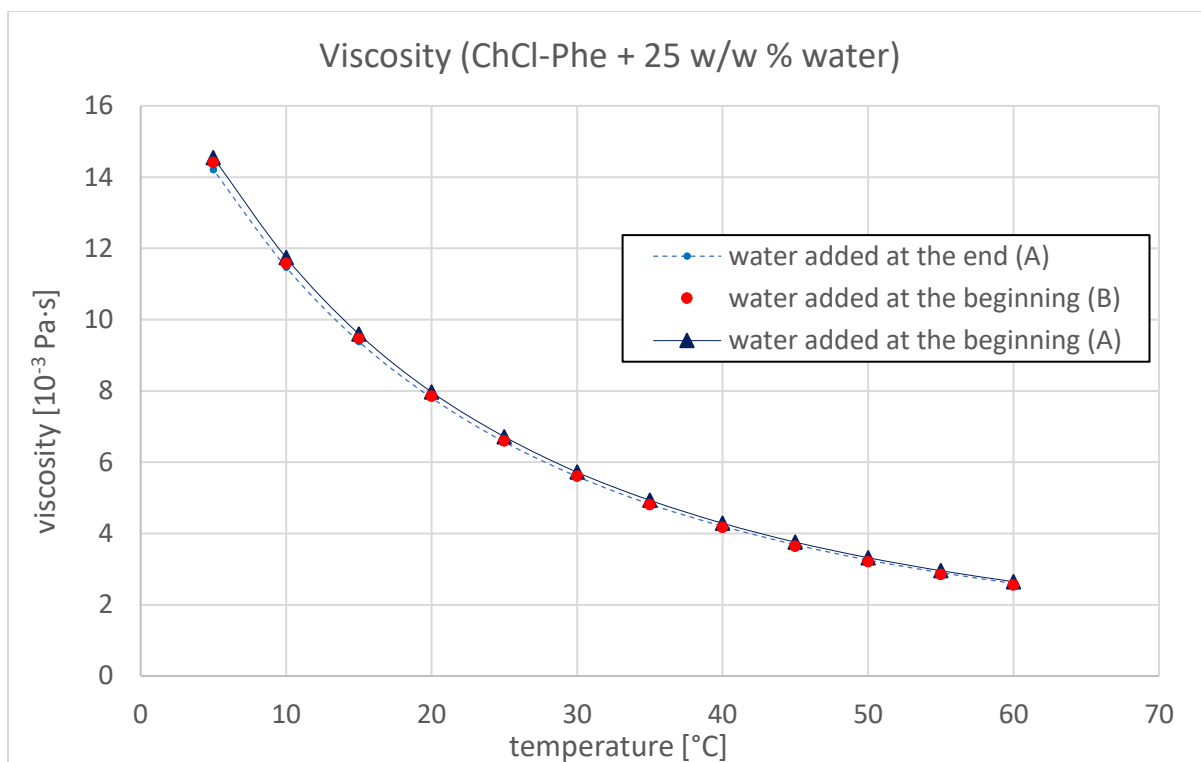

**Figure S4b.** Viscosity of concentrated ChCl-Phe (Table 1) aqueous DES mixture as a function of temperature and the kind of preparation (time of adding water to DES). The samples were prepared by different persons (A and B).

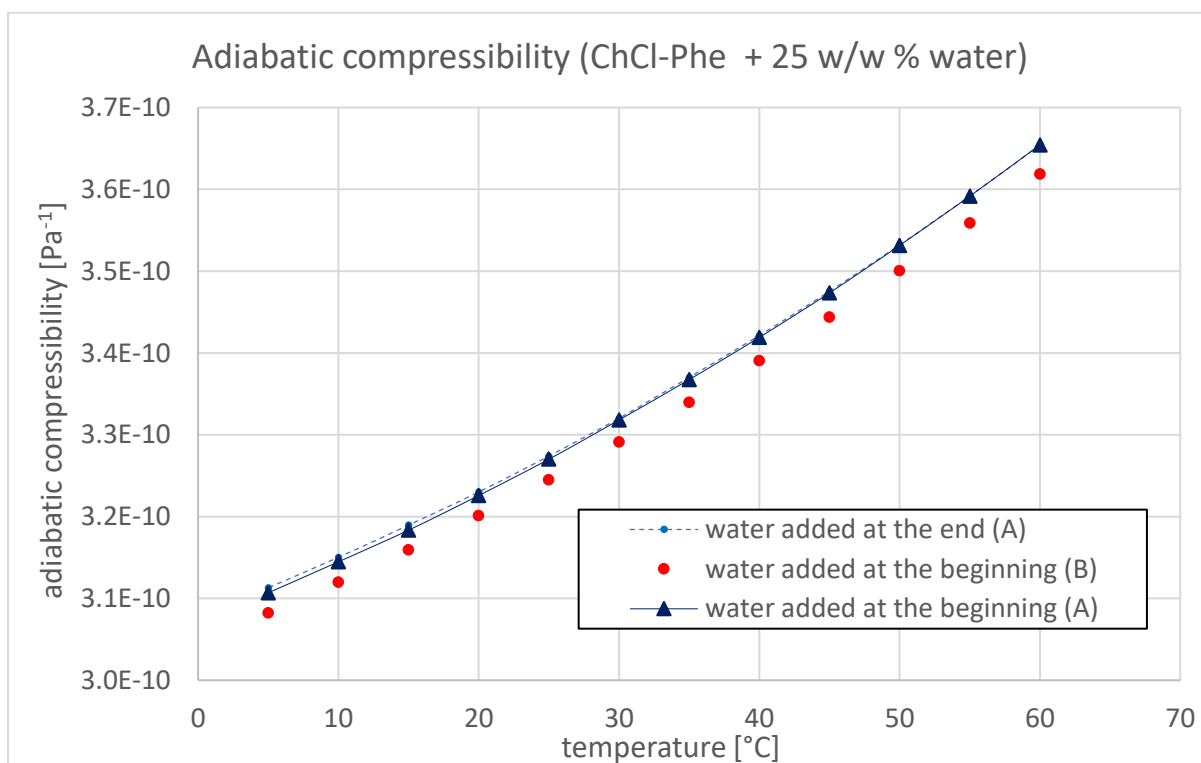

**Figure S4c.** Adiabatic compressibility of concentrated ChCl-Phe (Table 1) aqueous DES mixture as a function of temperature and the kind of preparation (time of adding water to DES). The samples were prepared by different persons (A and B).

**Table S1.** Quantity of  $\alpha$ -acids,  $\beta$ -acids, and xanthohumol extracted (reported as weight % of grinded hops pellets) as a function of both of extraction method and of kind of the extraction solvent used.

| sample<br>Nr | solvent                | extraction method | $\alpha$ -acids<br>(total) | $\beta$ -acids<br>(total) | xanthohumol |
|--------------|------------------------|-------------------|----------------------------|---------------------------|-------------|
| 1            | diethyl ether          | Soxhlet apparatus | 15.661                     | 7.640                     | 1.389       |
| 2            | hexane                 | Soxhlet apparatus | 10.778                     | 5.267                     | 0.008       |
| 3            | ethyl acetate          | Soxhlet apparatus | 6.706                      | 3.619                     | 0.654       |
| 4            | methanol               | Soxhlet apparatus | 5.486                      | 3.440                     | 0.485       |
| 5            | acetone                | Soxhlet apparatus | 5.134                      | 3.449                     | 0.514       |
| 6            | toluene                | Orbital shaker    | 6.858                      | 3.185                     | 0.090       |
| 7            | diethyl ether          | Orbital shaker    | 11.886                     | 5.724                     | 0.713       |
| 8            | hexane                 | Orbital shaker    | 7.291                      | 4.285                     | 0.005       |
| 9            | ethyl acetate          | Orbital shaker    | 5.929                      | 3.086                     | 0.393       |
| 10           | methanol               | Orbital shaker    | 5.222                      | 2.981                     | 0.405       |
| 11           | acetone                | Orbital shaker    | 4.632                      | 2.029                     | 0.446       |
| 12           | ethanol                | Orbital shaker    | 5.529                      | 3.070                     | 0.396       |
| 13           | methanol-water         | Orbital shaker    | 2.793                      | 0.101                     | 0.096       |
| 14           | ethanol-water          | Orbital shaker    | 4.916                      | 0.740                     | 0.298       |
| 15           | acetone-water          | Orbital shaker    | 3.573                      | 0.250                     | 0.303       |
| 16           | toluene                | UAE               | 6.732                      | 3.226                     | 0.082       |
| 17           | diethyl ether          | UAE               | 14.506                     | 6.816                     | 0.898       |
| 18           | hexane                 | UAE               | 9.998                      | 5.103                     | 0.010       |
| 19           | ethyl acetate          | UAE               | 5.878                      | 3.169                     | 0.402       |
| 20           | methanol               | UAE               | 5.667                      | 3.225                     | 0.427       |
| 21           | acetone                | UAE               | 5.817                      | 3.330                     | 0.476       |
| 22           | ethanol                | UAE               | 5.824                      | 3.317                     | 0.437       |
| 23           | methanol-water         | UAE               | 1.151                      | 0.064                     | 0.018       |
| 24           | ethanol-water          | UAE               | 4.514                      | 1.250                     | 0.270       |
| 25           | acetone-water          | UAE               | 3.477                      | 0.351                     | 0.257       |
| 26           | ChCl-Glu (+25 % water) | Orbital shaker    | 0.034                      | 0.000                     | 0.020       |
| 27           | ChCl-Fru (+25 % water) | Orbital shaker    | 0.047                      | 0.011                     | 0.023       |
| 28           | ChCl-LA (+25 % water)  | Orbital shaker    | 0.404                      | 0.069                     | 0.393       |
| 29           | ChCl-TA (+25 % water)  | Orbital shaker    | 0.176                      | 0.031                     | 0.068       |
| 30           | ChCl-Gly (+25 % water) | Orbital shaker    | 0.126                      | 0.016                     | 0.044       |
| 31           | ChCl-EG (+25 % water)  | Orbital shaker    | 0.448                      | 0.031                     | 0.273       |
| 32           | ChCl-U (+25 % water)   | Orbital shaker    | 0.164                      | 0.000                     | 0.046       |
| 33           | ChCl-DMU (+25 % water) | Orbital shaker    | 3.242                      | 0.347                     | 0.733       |
| 34           | ChCl-Phe (+25 % water) | Orbital shaker    | 13.043                     | 5.666                     | 0.890       |
| 35           | ChCl-BSA (+25 % water) | Orbital shaker    | 0.339                      | 0.000                     | 0.033       |
| 36           | ChCl-Glu (+25 % water) | UAE               | 0.053                      | 0.044                     | 0.016       |
| 37           | ChCl-Fru (+25 % water) | UAE               | 0.105                      | 0.078                     | 0.030       |
| 38           | ChCl-LA (+25 % water)  | UAE               | 0.408                      | 0.125                     | 0.349       |
| 39           | ChCl-TA (+25 % water)  | UAE               | 0.369                      | 0.185                     | 0.062       |
| 40           | ChCl-Gly (+25 % water) | UAE               | 0.450                      | 0.298                     | 0.121       |

|    |                        |     |        |       |       |
|----|------------------------|-----|--------|-------|-------|
| 41 | ChCl-EG (+25 % water)  | UAE | 0.494  | 0.046 | 0.300 |
| 42 | ChCl-U (+25 % water)   | UAE | 0.213  | 0.031 | 0.053 |
| 43 | ChCl-DMU (+25 % water) | UAE | 3.418  | 0.382 | 0.510 |
| 44 | ChCl-Phe (+25 % water) | UAE | 12.446 | 5.199 | 0.827 |
| 45 | ChCl-BSA (+25 % water) | UAE | 0.332  | 0.000 | 0.082 |
| 46 | ChCl-Glu (+25 % water) | UHE | 0.626  | 0.395 | 0.068 |
| 47 | ChCl-Fru (+25 % water) | UHE | 0.440  | 0.196 | 0.050 |
| 48 | ChCl-LA (+25 % water)  | UHE | 1.082  | 0.260 | 0.362 |
| 49 | ChCl-TA (+25 % water)  | UHE | 3.446  | 1.694 | 0.149 |
| 50 | ChCl-Gly (+25 % water) | UHE | 1.060  | 0.480 | 0.148 |
| 51 | ChCl-EG (+25 % water)  | UHE | 0.612  | 0.052 | 0.272 |
| 52 | ChCl-U (+25 % water)   | UHE | 0.626  | 0.176 | 0.077 |
| 53 | ChCl-DMU (+25 % water) | UHE | 4.526  | 0.635 | 0.463 |
| 54 | ChCl-Phe (+25 % water) | UHE | 10.994 | 4.854 | 0.693 |
| 55 | ChCl-BSA (+25 % water) | UHE | 0.053  | 0.000 | 0.000 |

**Table S2.** Statistical differences observed in extraction of  $\alpha$ -acids,  $\beta$ -acids, and xanthohumol (reported as weight % of grinded hops pellets) extracted for some chosen cases in the case of ultrasound assisted extraction (UAE). The results are shown for three repeated extractions with a given solvent together with the calculated mean value and standard deviation (expressed as mean value  $\pm$  standard deviation). Experimental details are reported in the main paper.

[2] – anhydrous ChCl-Phe DES was prepared first and afterwards water was added

[1] – ChCl, phenol, and 25 % (w/w) of water were put first together, heating and stirring were applied afterwards

| solvent                    | $\alpha$ -acids [w/w %] | $\beta$ -acids [w/w %] | xanthohumol [w/w %] |
|----------------------------|-------------------------|------------------------|---------------------|
| diethyl ether              | 14.1583                 | 7.2795                 | 0.9705              |
| diethyl ether              | 13.9730                 | 5.9293                 | 0.9745              |
| diethyl ether              | 14.2886                 | 7.3294                 | 0.9879              |
| ChCl-Phe (+25 % water) [2] | 12.4150                 | 5.3991                 | 0.9138              |
| ChCl-Phe (+25 % water) [2] | 12.2031                 | 5.3370                 | 0.8943              |
| ChCl-Phe (+25 % water) [2] | 12.5075                 | 5.5312                 | 0.9069              |
| ChCl-Phe (+25 % water) [1] | 12.8410                 | 5.6471                 | 0.9416              |
| ChCl-Phe (+25 % water) [1] | 12.5755                 | 5.4600                 | 0.9226              |
| ChCl-Phe (+25 % water) [1] | 10.9777                 | 4.5571                 | 0.8356              |
| ChCl-DMU (+25 % water)     | 3.5382                  | 0.3920                 | 0.4790              |
| ChCl-DMU (+25 % water)     | 3.5687                  | 0.3728                 | 0.4866              |
| ChCl-DMU (+25 % water)     | 3.4193                  | 0.3750                 | 0.4491              |
